# Supplementary material for: Meat, Masculinity, and Health for the “Typical Aussie Bloke”: A Social Constructivist Analysis of Class, Gender, and Consumption
Source: PubMed Central journal article supplement — Am J Mens Health. 2019 Nov 6;13(6):1557988319885561. doi: 10.1177/1557988319885561 (PMC6998030; doi:10.1177/1557988319885561), 2019-11-06
Supplement: Supplemental_Material.pdf [file Supplemental_Material.pdf]

## Supplementary Table 1

### COREQ Checklist

| Item                                                                                                        | Page number |
|-------------------------------------------------------------------------------------------------------------|-------------|
| <b>Domain 1: Research team and reflexivity</b>                                                              |             |
| 1. Interviewer/facilitator<br><i>Which author conducted the interviews?</i>                                 | 10          |
| 2. Credentials<br><i>What were the researcher's credentials</i>                                             | 10          |
| 3. Occupation<br><i>What was their occupation as the time of the study?</i>                                 | 10          |
| 4. Gender<br><i>Was the researcher male or female?</i>                                                      | 10          |
| 5. Experience and training<br><i>What experience or training did the researcher have?</i>                   | 10          |
| 6. Relationship established<br><i>Was a relationship established prior to study commencement?</i>           | NS          |
| 7. Participant knowledge of the interviewer<br><i>What did the participants know about the interviewer?</i> | 10          |
| 8. Interviewer characteristics<br><i>Characteristics of interviewer reported</i>                            | 10          |
| <b>Domain 2: Study design</b>                                                                               |             |
| 9. Methodological orientation and theory                                                                    | 5, 6        |
| 10. Sampling                                                                                                | 7           |
| 11. Method of approach                                                                                      | 7           |
| 12. Sample size                                                                                             | 7           |
| 13. Non-participation                                                                                       | 7           |
| 14. Setting of data collection                                                                              | 7           |
| 15. Presence of non-participants                                                                            | 7           |
| 16. Description of sample                                                                                   | Table 1     |
| 17. Interview guide                                                                                         | 9           |

|                                        |                    |
|----------------------------------------|--------------------|
| 18. Repeat interviews                  | N/A                |
| 19. Audio recording                    | 9                  |
| 20. Field notes                        | NS                 |
| 21. Duration                           | 9                  |
| 22. Data saturation                    | 10                 |
| 23. Transcripts returned               | 10                 |
| <b>Domain 3: Analysis and findings</b> |                    |
| 24. Number of data coders              | 9                  |
| 25. Description of coding tree         | N/A                |
| 26. Derivation of themes               | 9                  |
| 27. Software                           | N/A                |
| 28. Participant checking               | 9                  |
| 29. Quotations presented               | Throughout results |
| 30. Data and findings consistent       | Throughout results |
| 31. Clarity of major themes            | Throughout results |
| 32. Clarity of minor themes            | Throughout results |
